# Supplementary material for: Unterstützung kundenbezogener Entscheidungsprobleme
Source: Springer Nature journal article supplement (doi:10.1007/s11576-010-0216-4), 2010-03-04
Supplement: 11576_2010_216_MOESM1_ESM.pdf [file 11576_2010_216_MOESM1_ESM.pdf]

[Anhang] [ESM - Online only]

### **Anhang I: Modellselektion**

Einige Klassifikatoren besitzen spezielle Parameter, die vor einer Nutzung des Verfahrens durch den Anwender vorgegeben werden müssen. Beispielsweise muss für den k-NN-Klassifikator die Zahl der zu betrachteten Nachbarobjekte spezifiziert werden. Zur Kalibrierung solcher Parameter wurde ein vollautomatischer Ansatz verfolgt: Auf Basis von Literaturempfehlungen wurde je Parameter eine Kandidatenliste gebräuchlicher Einstellungen erstellt. Anschließend wurden sämtliche Alternativen je Durchlauf und Datensatz empirisch mittels einer fünffachen Kreuzvalidierung (Izenman 2008, S. 121) auf den Trainingsdaten evaluiert und die Einstellung mit höchstem AUC-Wert ausgewählt. Mit dieser Einstellung wurde ein endgültiges Klassifikationsmodell auf den kompletten Trainingsdaten erstellt und zur Vorhersage der Testdaten verwendet. Für einen Klassifikator mit z. B. zwei Verfahrensparametern und jeweils drei alternativen Einstellungen ergeben sich bei dieser Vorgehensweise:  $(3 \cdot 3 \text{ Parameterkombinationen} \cdot 5\text{-facher Kreuzvalidierung} \cdot 10 \text{ zufälligen Trainings-/Testmengen}) + 10$  endgültigen Klassifikationsmodellen = 460 zu erstellende und bewertende Klassifikationsmodelle je Datensatz. Hierdurch wird für jeden Klassifikator und jede zufällige gezogene Trainingsstichprobe die bestmögliche Parametrisierung aus den gegebenen Alternativen ausgewählt. Die entsprechenden Kandidatenlisten zeigt Tab. 6.

[Tab06]

Tab. 6 In der Modellselektion untersuchte Parametereinstellungen

| Klassifikator (vgl. Tab. 1) | Anzahl freier Parameter | Parameter                                                                                                                                                                                                                                                                                                               | Untersuchte Einstellungen                                                                                                                                                                                                                                                                                                                                                                  |
|-----------------------------|-------------------------|-------------------------------------------------------------------------------------------------------------------------------------------------------------------------------------------------------------------------------------------------------------------------------------------------------------------------|--------------------------------------------------------------------------------------------------------------------------------------------------------------------------------------------------------------------------------------------------------------------------------------------------------------------------------------------------------------------------------------------|
| NBayes                      | 0                       |                                                                                                                                                                                                                                                                                                                         |                                                                                                                                                                                                                                                                                                                                                                                            |
| LDA                         |                         | Diese Verfahren bedürfen prinzipiell keiner Parametereinstellung. Aufgrund numerischer Probleme kann das zugrundeliegende Optimierungsproblem aber z. T. bei hochdimensionalen Datensätzen mit korrelierten Merkmalen nicht gelöst werden. Daher wurde eine rückwärtsgerichtete Merkmalsselektionsheuristik eingesetzt. |                                                                                                                                                                                                                                                                                                                                                                                            |
| QDA                         |                         |                                                                                                                                                                                                                                                                                                                         |                                                                                                                                                                                                                                                                                                                                                                                            |
| LogReg                      |                         |                                                                                                                                                                                                                                                                                                                         |                                                                                                                                                                                                                                                                                                                                                                                            |
| K-NN                        | 1                       | Anzahl der nächsten Nachbarn                                                                                                                                                                                                                                                                                            | [1;3;5;7;9]                                                                                                                                                                                                                                                                                                                                                                                |
| C4.5                        | 1                       | Konfidenz der Pruningstrategie zum Zurückschneiden des Entscheidungsbaumes                                                                                                                                                                                                                                              | [0,1; 0,2; 0,25; 0,3]                                                                                                                                                                                                                                                                                                                                                                      |
| CART                        | 0                       |                                                                                                                                                                                                                                                                                                                         |                                                                                                                                                                                                                                                                                                                                                                                            |
| LSVM                        | 1                       | Regularisierungskonstante                                                                                                                                                                                                                                                                                               | $2^{[-6, -5, \dots, 16]}$ *                                                                                                                                                                                                                                                                                                                                                                |
| RBF SVM                     | $\geq 3$                | Regularisierungskonstante                                                                                                                                                                                                                                                                                               | Für eine nichtlineare Projektion der Daten wurde die radiale Basisfunktion eingesetzt. Diese besitzt einen freien Parameter, sodass insg. zwei Einstellungen zu treffen waren. Für die simultane Optimierung beider Parameter wurde ein heuristischer Suchalgorithmus implementiert. Dieser hat im Durchschnitt 21 verschiedene Einstellungen evaluiert, um ein lokales Optimum zu finden. |
|                             |                         | Kernfunktion für die nichtlineare Abbildung der Daten                                                                                                                                                                                                                                                                   |                                                                                                                                                                                                                                                                                                                                                                                            |
|                             |                         | Individuelle Parameter der Kernfunktion.                                                                                                                                                                                                                                                                                |                                                                                                                                                                                                                                                                                                                                                                                            |
| RVM                         | 0                       |                                                                                                                                                                                                                                                                                                                         |                                                                                                                                                                                                                                                                                                                                                                                            |
| Bagging                     | 1                       | Anzahl der Basisklassifikatoren im Ensemble                                                                                                                                                                                                                                                                             | [5; 25; 50]                                                                                                                                                                                                                                                                                                                                                                                |
| RF                          | 2                       | Anzahl der Entscheidungsbäume im Ensemble                                                                                                                                                                                                                                                                               | [50; 100; 250; 500]                                                                                                                                                                                                                                                                                                                                                                        |
|                             |                         | Anzahl der zufällig betrachteten Attribute je Ebene eines Entscheidungsbaumes                                                                                                                                                                                                                                           | $[0,5; 1; 2] \cdot \sqrt{M}$<br>M = Anzahl Merkmale                                                                                                                                                                                                                                                                                                                                        |
| SGB                         | 1                       | Anzahl der Boosting-Iterationen                                                                                                                                                                                                                                                                                         | [5; 10; 25]                                                                                                                                                                                                                                                                                                                                                                                |

\* Es ist üblich, eine exponentiell-skalierte Kandidatenliste zu verwenden, um einen möglichst großen Wertebereich zu evaluieren (Hsu et al. 2003, S. 5).
